# Supplementary material for: Informatics for RNA Sequencing: A Web Resource for Analysis on the Cloud
Source: PLOS journal article supplement (doi:10.1371/journal.pcbi.1004393), 2015-08-06
Supplement: S10 (10.1371/journal.pcbi.1004393.s010) [file journal.pcbi.1004393.s010]

### S8 Table. General resources for RNA-seq analysis

The following table provides a list of general resources to help understand the background of RNA biology, next generation sequencing, RNA-seq laboratory methods, and RNA-seq analysis. Additional educational resources can be found in the [resources section](#) of the online tutorial at [www.rnaseq.wiki](http://www.rnaseq.wiki).

| Resource name and description                                                                                                                                                                           |
|---------------------------------------------------------------------------------------------------------------------------------------------------------------------------------------------------------|
| <a href="#">SeqAnswers</a> . An online forum for next generation sequencing.                                                                                                                            |
| <a href="#">BioStars</a> . An online forum for bioinformatics [90].                                                                                                                                     |
| Illumina videos on the basics of NGS sequencing: <a href="#">video 1</a> , <a href="#">video 2</a> .                                                                                                    |
| <a href="#">Molecular Biology of the Cell. From DNA to RNA</a> . A comprehensive introduction to transcription, strandedness, RNA types, gene regulation, RNA polymerase function, splicing, and so on. |
| The <a href="#">RNA-seqlopedia</a> . An overview of RNA-seq and the choices necessary to carry out a successful RNA-seq experiment.                                                                     |
| <a href="#">RNA-seq Data: Challenges in and Recommendations for Experimental Design and Analysis</a> .                                                                                                  |
| <a href="#">RNA Bioinformatics</a> , a 25 chapter book covering many topics relevant to RNA-seq analysis.                                                                                               |
| <a href="#">The RNA-seq blog</a> . An actively maintained blog of RNA-seq related developments.                                                                                                         |
| <a href="#">RNA-seq - Protocols and Algorithms</a> . An active RNA-seq blog.                                                                                                                            |
| <a href="#">HTS Mappers</a> . An actively maintained list of short read aligners (RNA-seq aligners are indicated in red).                                                                               |
| <a href="#">The periodic table of bioinformatics</a> . A list of commonly used bioinformatics tools.                                                                                                    |
| <a href="#">ENCODE standards</a> , guidelines and best practices for RNA-seq.                                                                                                                           |
| <a href="#">REMC standards</a> and guidelines for RNA-sequencing.                                                                                                                                       |
| <a href="#">A comprehensive assessment of RNA-seq accuracy, reproducibility and information content</a> by the Sequencing Quality Control Consortium.                                                   |
| <a href="#">List of RNA-seq bioinformatics tools</a> .                                                                                                                                                  |
| <a href="#">GEO: The Gene Expression Omnibus</a> (contains many publicly available RNA-seq data sets).                                                                                                  |
